# Supplementary material for: Acceleration of western Arctic sea ice loss linked to the Pacific North American pattern
Source: PubMed Central journal article supplement (PMC7943814; doi:10.1038/s41467-021-21830-z), 2021-03-09
Supplement: 41467_2021_21830_MOESM1_ESM.pdf [file 41467_2021_21830_MOESM1_ESM.pdf]

# Acceleration of western Arctic sea ice loss linked to the Pacific North American pattern

Zhongfang Liu<sup>1\*</sup>, Camille Risi<sup>2</sup>, Francis Codron<sup>3</sup>, Xiaogang He<sup>4</sup>, Christopher J. Poulsen<sup>5</sup>, Zhongwang Wei<sup>6,7</sup>, Dong Chen<sup>8</sup>, Sha Li<sup>9</sup> and Gabriel J. Bowen<sup>10</sup>

<sup>1</sup> State Key Laboratory of Marine Geology, Tongji University, Shanghai 200092, China

<sup>2</sup> Laboratoire de Météorologie Dynamique, IPSL, CNRS, Sorbonne Université, Paris 75252, France

<sup>3</sup> LOCEAN, Sorbonne Université, Paris 75252, France

<sup>4</sup> Department of Civil and Environmental Engineering, National University of Singapore, 117576, Singapore

<sup>5</sup> Department of Earth and Environmental Sciences, University of Michigan, Ann Arbor, MI 48109, USA

<sup>6</sup> Guangdong Province Key Laboratory for Climate Change and Natural Disaster Studies, School of Atmospheric Sciences, Sun Yat-sen University, Guangzhou 510275, China

<sup>7</sup> Southern Marine Science and Engineering Guangdong Laboratory (Zhuhai), Zhuhai 519000, China

<sup>8</sup> Nansen-Zhu International Research Centre, Institute of Atmospheric Physics, Chinese Academy of Sciences, Beijing 100029, China

<sup>9</sup> Department of Earth System Science, Tsinghua University, Beijing 100084, China

<sup>10</sup> Department of Geology and Geophysics, University of Utah, Salt Lake City, UT 84112, USA

\* Corresponding author: Zhongfang Liu, email: liuzf406@gmail.com

This document includes the Supplementary Figures that are referred to in the main text.

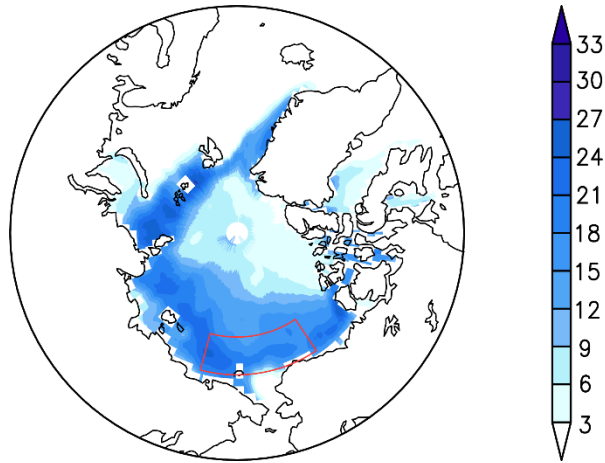

**Supplementary Figure 1 | Interannual to decadal variability in summer Arctic SIC.** The variability is defined by the standard deviation of summer mean SIC over the period 1979–2016. The box marks the western Arctic Ocean defined in Fig. 1.

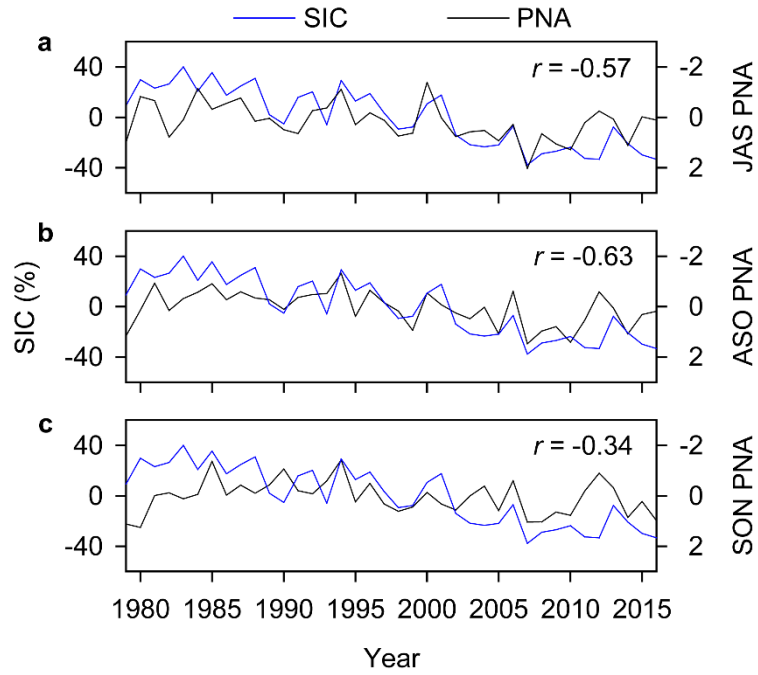

**Supplementary Figure 2 | Lead-lag relationship between the PNA and western Arctic SIC indices. a–c,** The SIC index lags the PNA index by 1-month (a), 0-month (b) and -1-month (c). The values on the plots show the correlation coefficients and all are significant at the 5% level.

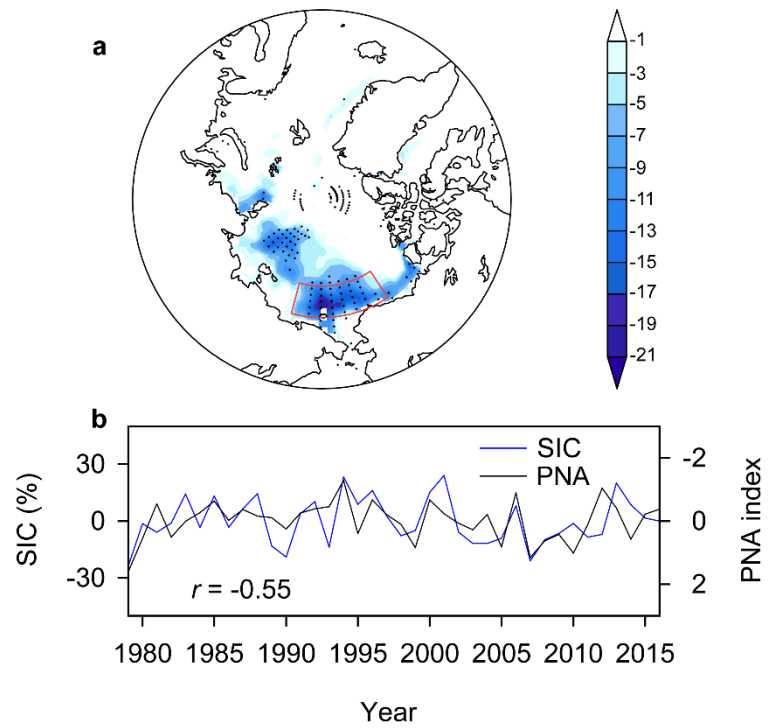

**Supplementary Figure 3 | Arctic SIC responses to interannual PNA variability. a,**

Detrended SIC regressed onto the PNA index. The stippling indicates statistical significance at the 5% level and the box marks the western Arctic Ocean defined in

Fig. 1. **b**, Detrended time series of the PNA and western Arctic SIC indices.

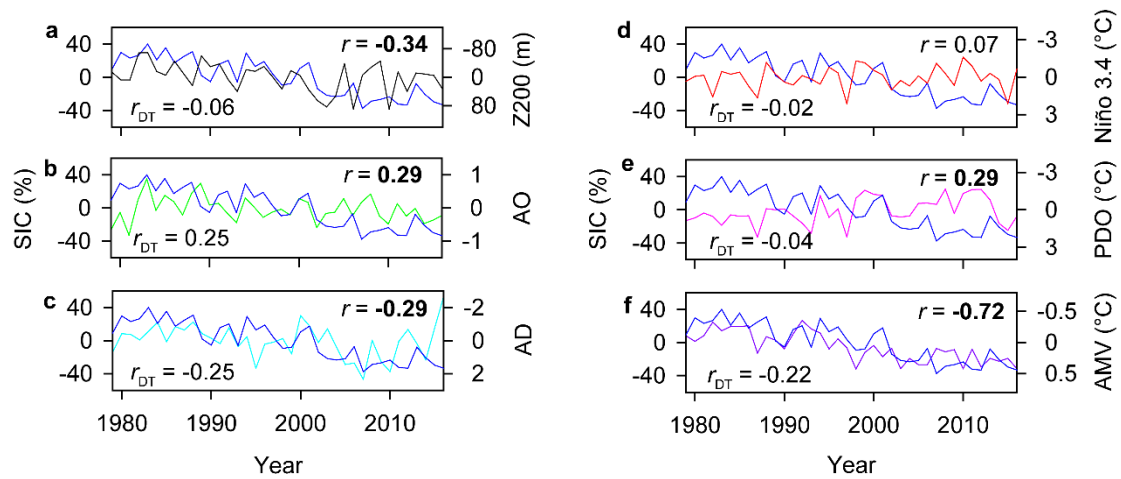

**Supplementary Figure 4 | Relationship between the western Arctic SIC and**

**climate indices. a,** Time series of western Arctic SIC and anticyclonic circulation

over Greenland (GL-Z200) defined by Ref<sup>1</sup>. **b–f,** Same as **a** but for the North Atlantic

Oscillation (NAO, **b**), the Arctic Dipole (AD, **c**), the Niño 3.4 (**d**), the Pacific Decadal

Oscillation (PDO, **e**) and the Atlantic Multidecadal Variability (AMV, **f**).  $r$  and  $r_{DT}$

denote the non-detrended and detrended correlations, respectively, and bold type

indicates statistical significance at the  $p < 0.1$  level.

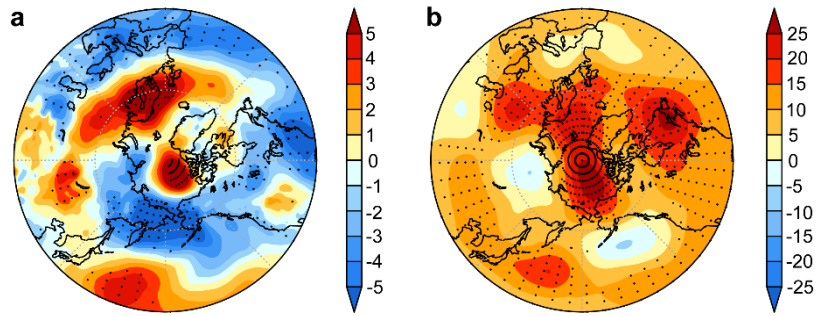

**Supplementary Figure 5 | Atmospheric circulation patterns linked to western Arctic SIC changes. a**, 1000 hPa geopotential height (m) regressed onto the standardized western Arctic SIC index. **b**, Same as **a** but for 250 hPa geopotential height (m). The stippling indicates statistical significance at the 5% level.

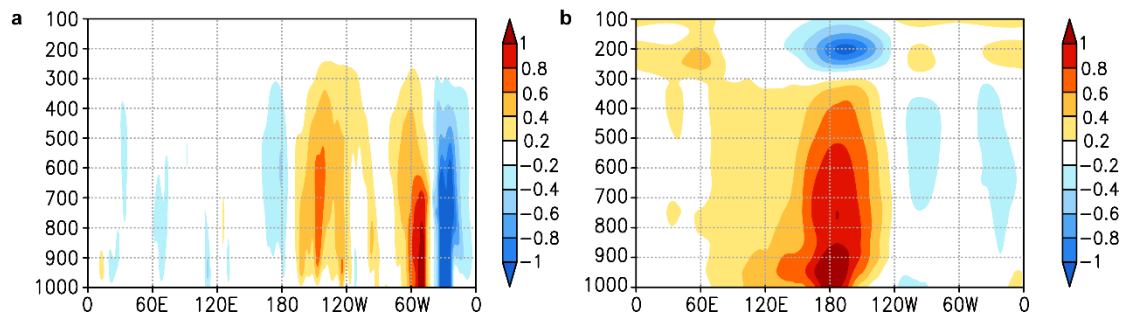

**Supplementary Figure 6 | Vertical velocity and temperature responses to**

**interannual PNA variability. a**, Height–longitude cross sections of vertical velocity ( $10^{-2} \text{ Pa s}^{-1}$ ) averaged over  $70\text{--}80^\circ\text{N}$  regressed onto the PNA index. **b**, Same as **a** but for temperature ( $^\circ\text{C}$ ). All climate variables were linearly detrended before the calculation.

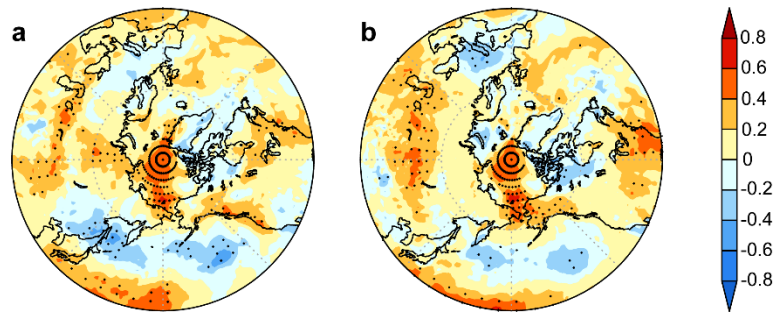

**Supplementary Figure 7 | Radiation responses to interannual PNA variability. a,** Spatial correlations of the PNA index with downwelling longwave radiation (DLR). **b,** Same as **a** but for upwelling longwave radiation (ULR). All climate variables were linearly detrended before the calculation. The stippling indicates statistical significance at the 5% level in all plots.



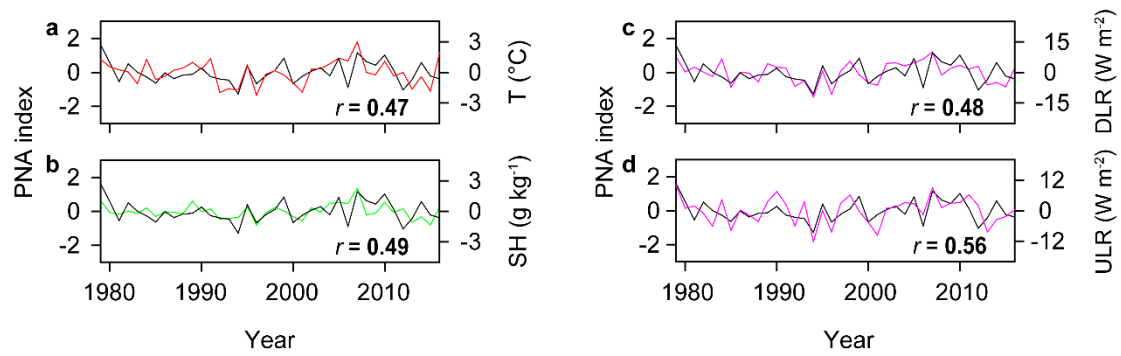

**Supplementary Figure 8 | Relationship between the PNA index and western**

**Arctic thermodynamic variables. a**, Time series of the detrended PNA index and lower-tropospheric (1000–850 hPa) temperature (T). **b–d**, Same as **a** but for lower-tropospheric specific humidity (SH, **b**), downwelling longwave radiation (DLR, **c**) and upwelling longwave radiation (ULR, **d**). The values on the plots show the correlation coefficients, and bold type indicates statistical significance at the 5% level.

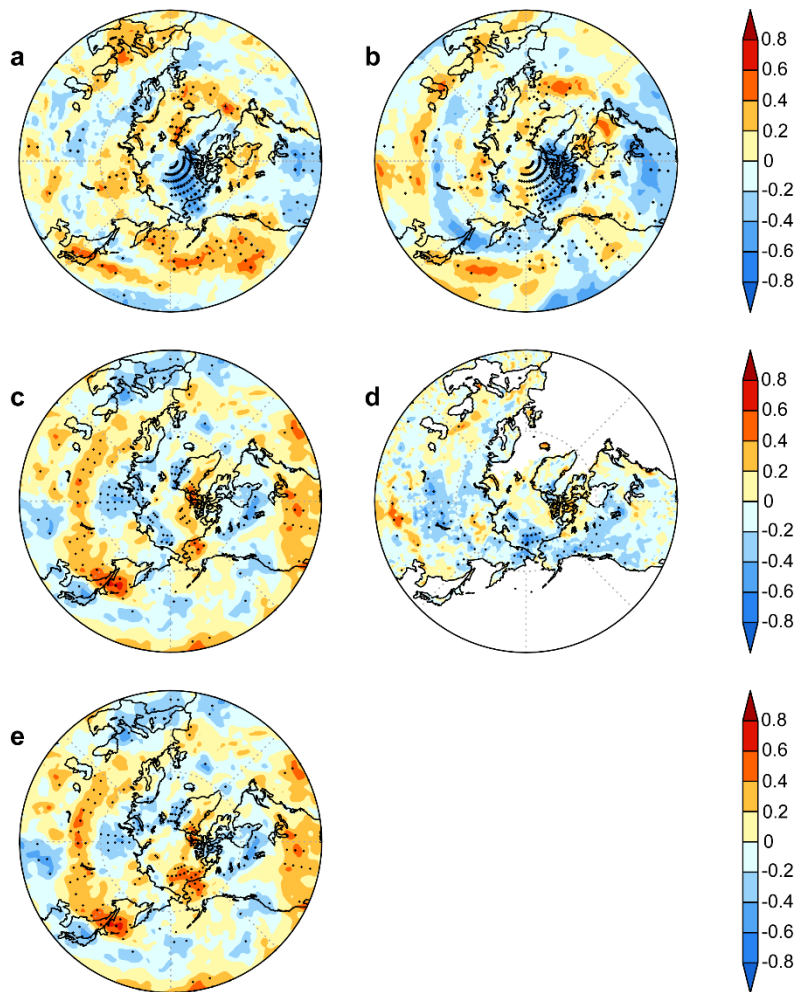

**Supplementary Figure 9 | Radiation responses to interannual PNA variability. a,** Spatial correlations of the PNA index with middle cloud cover (MCC). **b–e,** Same as **a** but for high cloud cover (HCC, **b**), downwelling shortwave radiation (DSR, **c**), surface albedo (AL, **d**) and net shortwave radiation (NSR, **e**). All climate variables were linearly detrended before the calculation. The stippling indicates statistical significance at the 5% level in all plots.

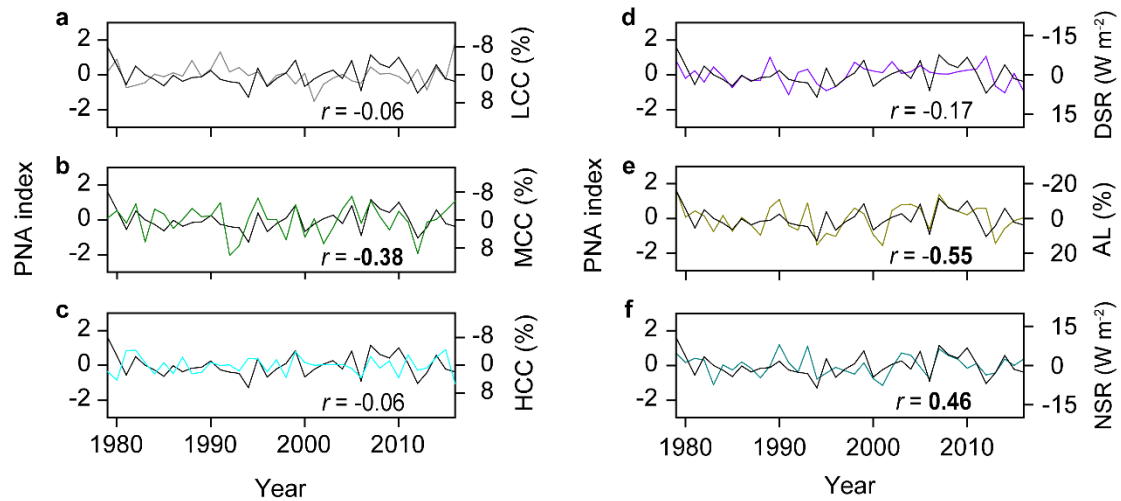

**Supplementary Figure 10 | Relationship between the PNA index and western**

**Arctic radiation variables. a,** Time series of the detrended PNA index and western

Arctic low cloud cover (LCC). **b–f,** Same as **a** but for middle cloud cover (MCC, **b**),

high cloud cover (HCC, **c**), downwelling shortwave radiation (DSR, **d**), surface

albedo (AL, **e**) and net shortwave radiation (NSR, **f**). The values on the plots show the

correlation coefficients, and bold type indicates statistical significance at the 5% level.

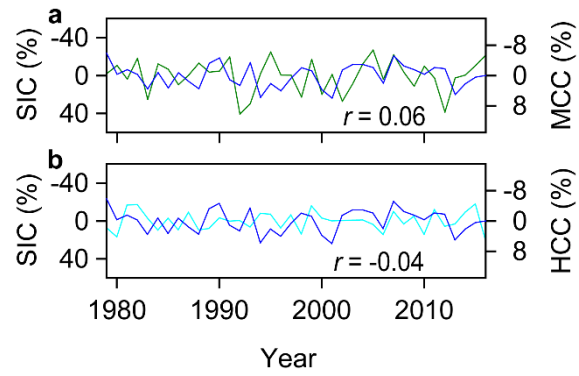

**Supplementary Figure 11 | Relationship between western Arctic SIC and cloud cover. a, b**, Time series of the detrended western Arctic SIC, middle cloud cover (MCC, **a**) and high cloud cover (HCC, **b**). The values on the plots show the correlation coefficients.

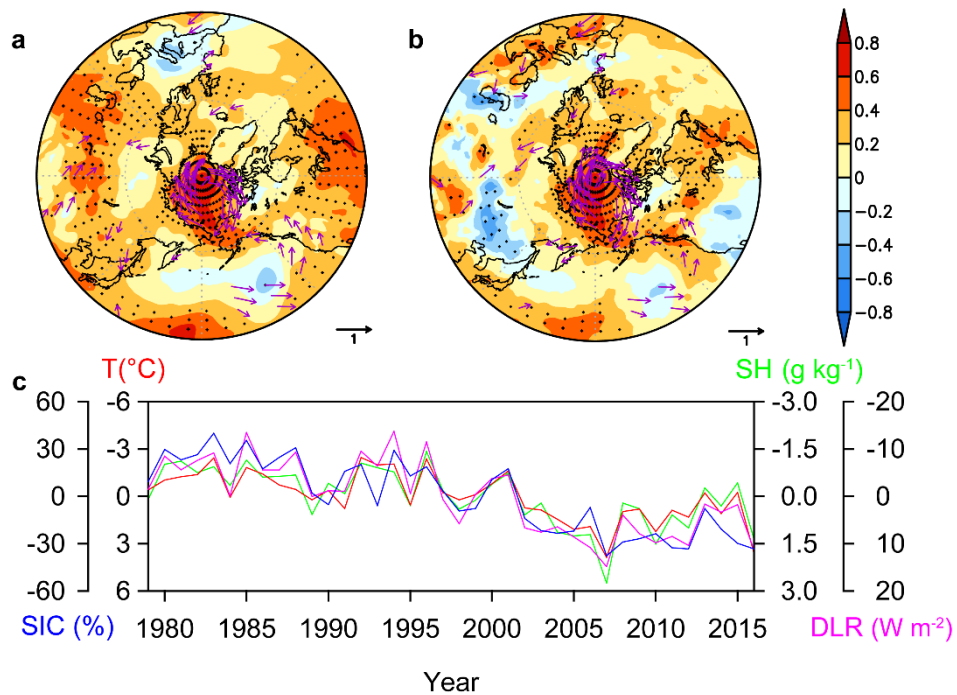

**Supplementary Figure 12 | PNA-induced thermodynamic changes and its influence on western Arctic SIC. a**, Spatial correlations between the non-detrended PNA index and western Arctic lower-tropospheric temperature (shading) and vertically integrated heat flux (arrows). **b**, Same as **a** but for lower-tropospheric specific humidity (shading) and vertically integrated moisture flux (arrows). **c**, Time series of the non-detrended western Arctic SIC index (blue) and the lower-tropospheric temperature (T, red) humidity (SH, green) and downwelling longwave radiation (DLR, pink). Shading with stippling in **a** and **b** indicates statistical significance at the 5% level.

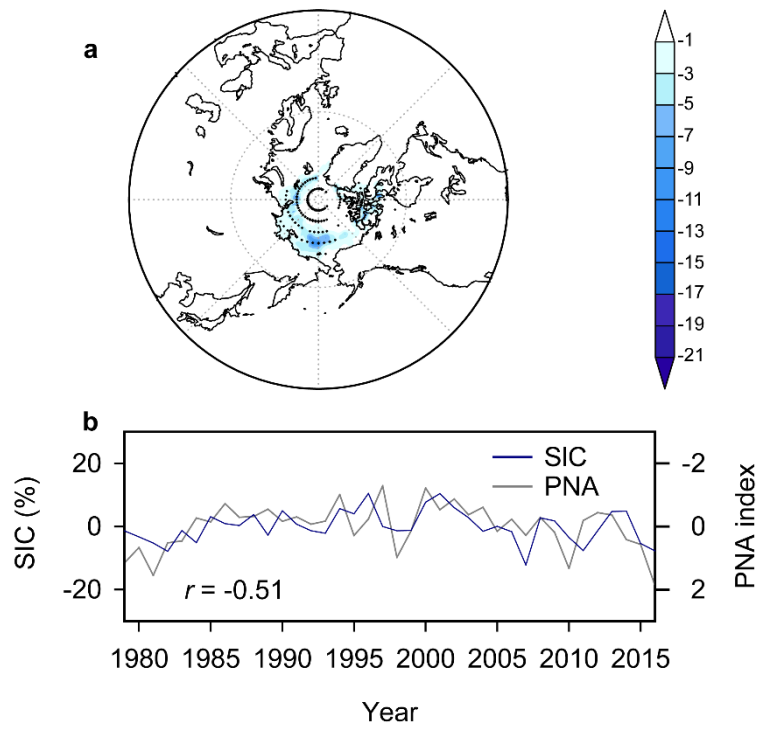

**Supplementary Figure 13 | Simulated Arctic SIC responses to interannual PNA variability.** **a**, Detrended SIC regressed onto the PNA index. **b**, Detrended time series of the PNA and SIC indices. The stippling indicates statistical significance at the 5% level in **a**.

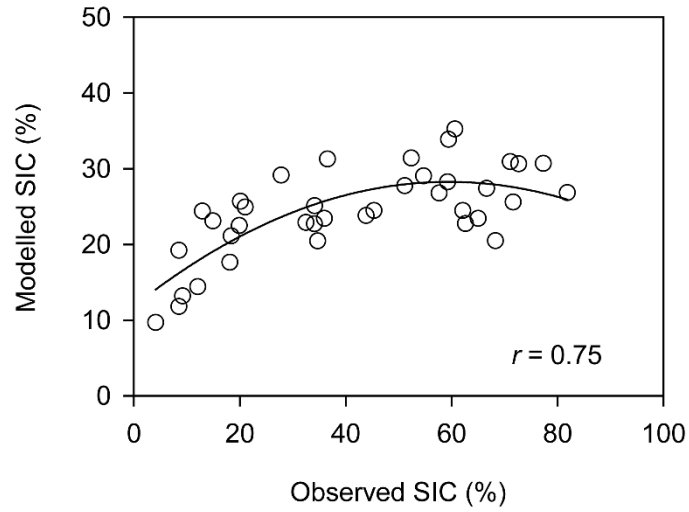

**Supplementary Figure 14 | Comparison between the observed and simulated western Arctic SIC.** The black line is a second-order polynomial fit to the data with a coefficient of determination of 0.56.

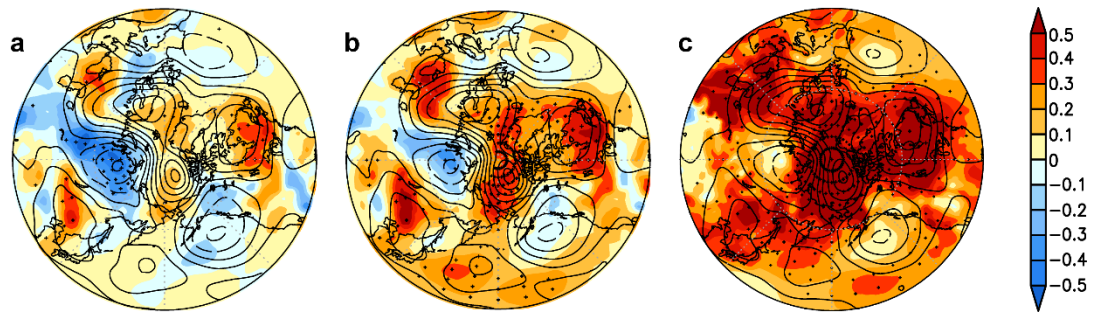

**Supplementary Figure 15 | Observed and simulated changes in atmospheric circulation and lower-tropospheric temperature. a–c** Linear trends of Z500 (contour, 25 m interval) and 1000–850 hPa temperature (shading, °C per decade) over the period 1979–2016 for forced-nudged simulation (**a**), slab-nudged simulation (**b**) and observations (**c**). Shading with stippling indicates statistical significance at the 5% level in all plots.



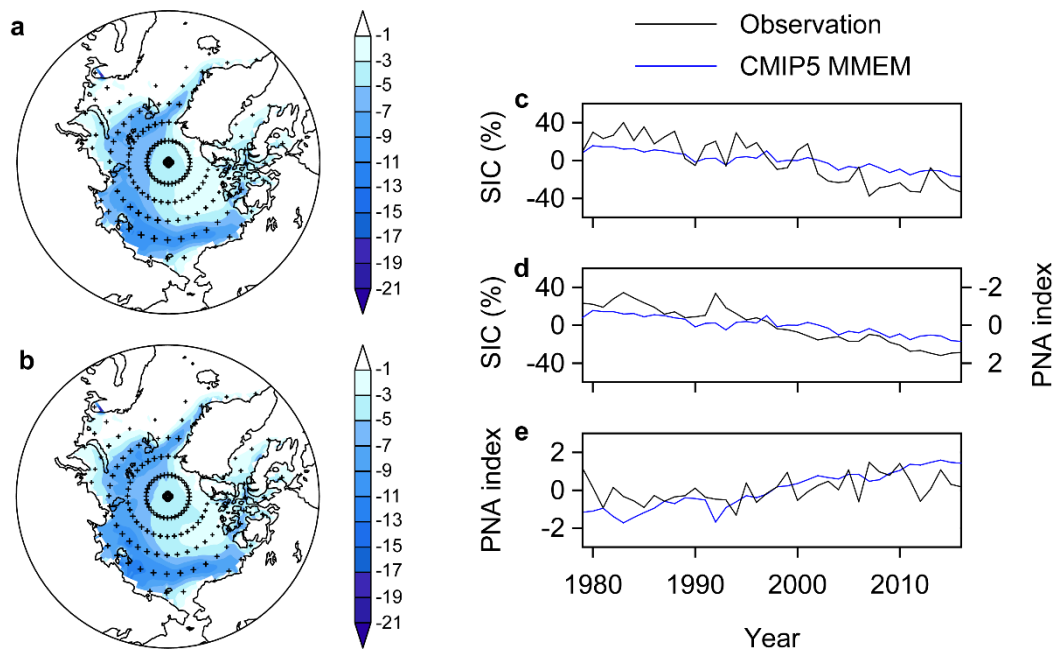

**Supplementary Figure 16 | Arctic SIC responses to PNA changes in the CMIP5 multi-model ensemble mean (MMEM).** **a**, Linear trend (% per decade) of SIC over the period 1979–2016. **b**, SIC regressed onto the PNA index. **c**, Time series of the western Arctic SIC anomaly. **d**, Time series of the western Arctic SIC anomaly along with the PNA index. **e**, Time series of the PNA index. Shading with stippling indicates statistical significance at the 5% level in **a** and **b**. The 12 CMIP5<sup>2</sup> models include ACCESS1-0, ACCESS1-3, CCSM4, CESM1-CAM5, CNRM-CM5, CSIRO-Mk3-6-0, FIO-ESM, GISS-E2-H, HadGEM2-AO, IPSL-CM5A-MR, MIROC5 and MPI-ESM-LR.

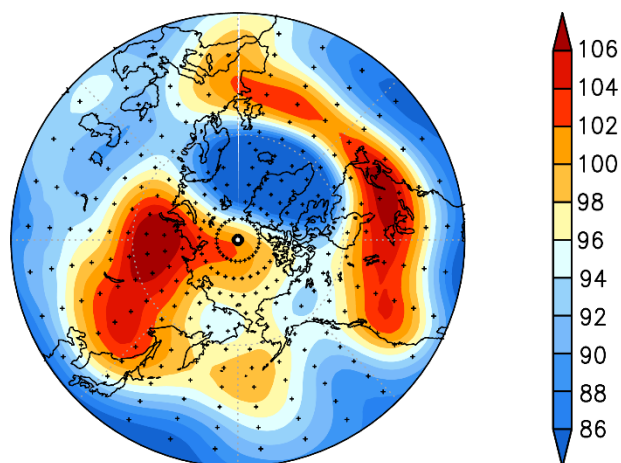

**Supplementary Figure 17 | Projected changes in atmospheric circulation pattern.**

Difference in multi-model ensemble mean (MEM) Z500 (m) between the RCP 8.5 simulation and the historical simulation from 12 Coupled Model Intercomparison Project Phase 5 (CMIP5)<sup>2</sup> models, calculated as 2070–2095 minus 1980–2005. Areas with significance at the  $p < 0.05$  level are stippled. The MEM projects an enhanced positive PNA-like pattern for the future period, relative to the historical period, with eastward and northward shifts in the centers of action<sup>3</sup>.

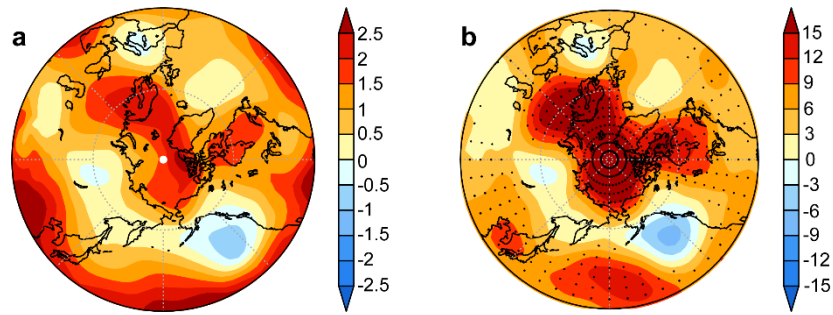

**Supplementary Figure 18 | Simulated PNA pattern. a**, Simulated pattern of the first Empirical Orthogonal Function (EOF1, 22.94 % of the total variance) of Z500. **b**, Z500 (m) regressed onto the standardized EOF1 time series shown in Fig. 5c. Shading with stippling indicates statistical significance at the 5% level in **b**.

## References

- 1 Ding, Q. *et al.* Influence of high-latitude atmospheric circulation changes on summertime Arctic sea ice. *Nat. Clim. Change* **7**, 289 (2017).
- 2 Taylor, K. E., Stouffer, R. J. & Meehl, G. A. An overview of CMIP5 and the experiment design. *Bull. Am. Meteorol. Soc.* **93**, 485-498 (2012).
- 3 Liu, Z., He, X., Ma, W. & Wang, Y. Robust increases in extreme Pacific North American events under greenhouse warming. *Geophys. Res. Lett.* **47**, doi:<https://doi.org/10.1029/2019GL086309> (2019).
